# Supplementary material
Source: PubMed Central journal article supplement (PMC8478306)
Supplement: NIHMS1740014-supplement-1.pdf [file NIHMS1740014-supplement-1.pdf]

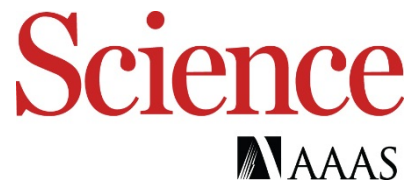

Supplementary Materials for

**Enterically derived high-density lipoprotein restrains liver  
injury via the portal vein**

Yong-Hyun Han, Emily J. Onufer, Li-Hao Huang, Robert W. Sprung, W. Sean Davidson, Rafael S. Czepielewski, Mary Wohltmann, Mary G. Sorci-Thomas, Brad W. Warner, Gwendalyn J. Randolph

Correspondence to: [gjrandolph@wustl.edu](mailto:gjrandolph@wustl.edu)  
[yhhan1015@kangwon.ac.kr](mailto:yhhan1015@kangwon.ac.kr)

**This PDF file includes:**

Figs. S1 to S10  
Caption to Table S1 provided as separate Excel file  
Table S2

*Supplementary Figures and Legends*

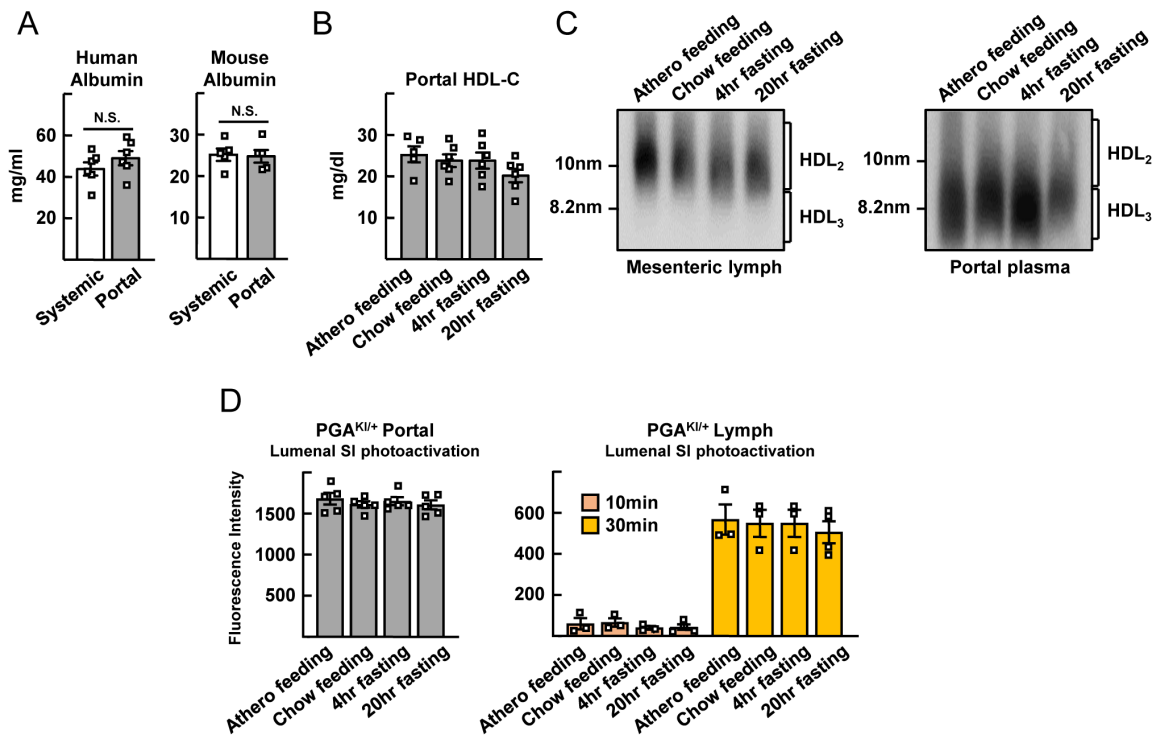

**Figure S1. HDL status in relation to dietary feeding and fasting.**

(A) Albumin levels of systemic and portal human or mouse plasma were measured. (B-D) Mice were fed with atherogenic (Athero) or standard chow diet, or fasted for 4 or 20 hours. (B) Portal HDL cholesterol levels. (C) Immunoblots for apoA1 run on a nondenaturing gel of mesenteric lymph and portal plasma samples from panel B. (D) The lumen of the small intestinal ileum (SI) of *Pga1*<sup>KI/+</sup> mice was photoactivated; portal plasma and mesenteric lymph fluorescence was assessed 5, 10, or 30 min later (portal blood, gray bars; lymph, yellow bars). All data are plotted as mean  $\pm$  SEM analyzed by unpaired two-tailed Student's *t* test and include a mix of males and females, with each symbol on the bar graphs representing a single mouse or human.

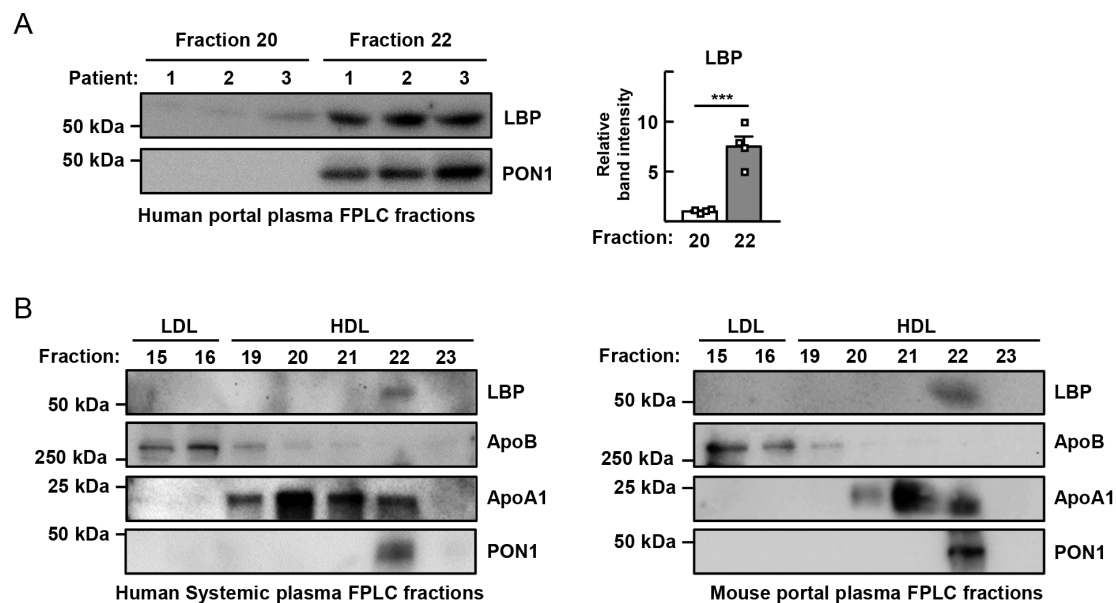

**Figure S2. Plasma protein profiling in FPLC-separated fractions.**

(A) Immunoblotting for LBP in three paired human samples after HDL was separated into fractions (fraction numbers shown) using size-exclusion chromatography. Fraction 20 contains the larger HDL<sub>2</sub>, and fraction 22 the smaller HDL<sub>3</sub>. Relative band intensity measured for four paired samples are graphically depicted on the right. (B) Human systemic and mouse portal plasma was separated by FPLC size-exclusion chromatography. LBP, apoB, apoA1, or PON1 in FPLC-separated fractions was analyzed by immunoblotting. Plots show mean  $\pm$  SEM analyzed by paired two-tailed Student's *t* test. \*\*\**P*<0.001

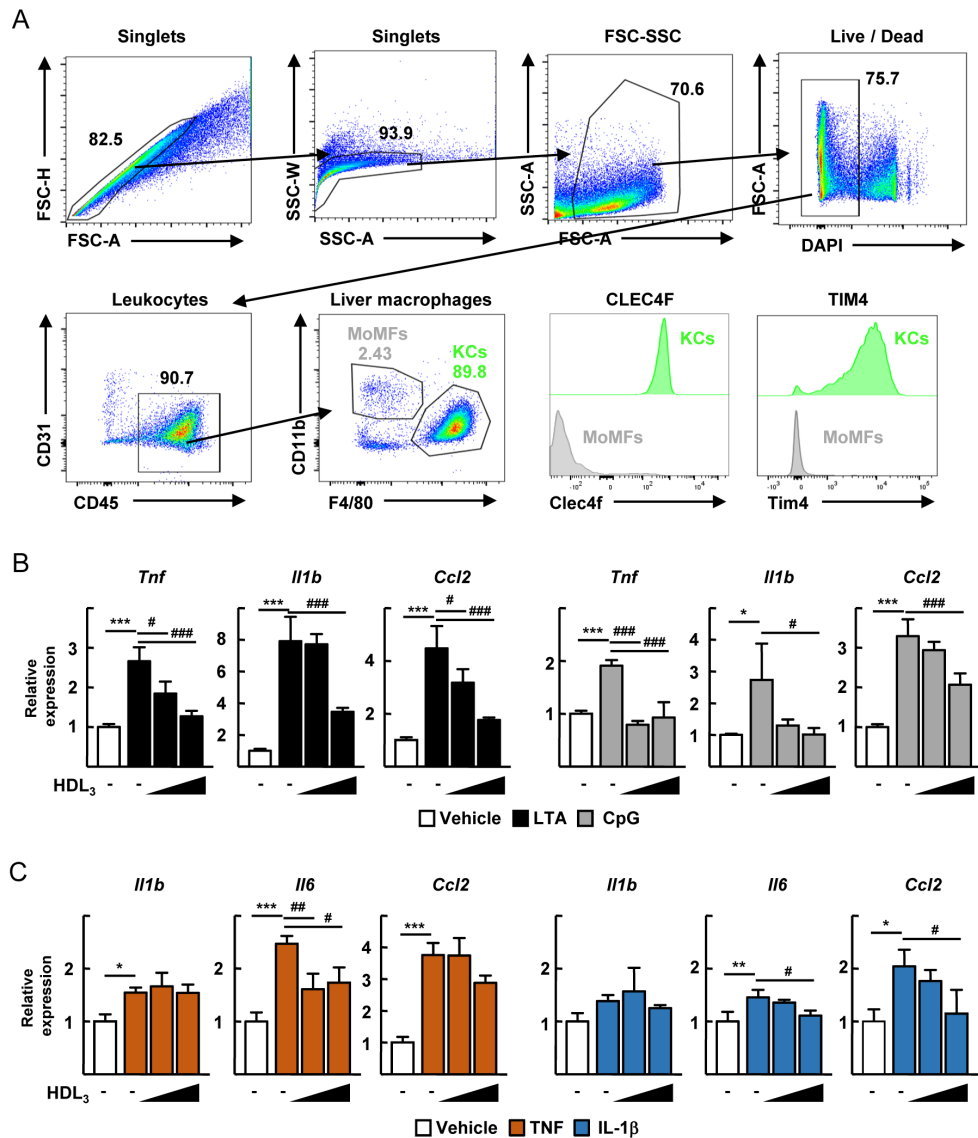

**Figure S3. Gating strategy and inflammatory responses of liver Kupffer cells.**

(A) Gating strategy and representative flow plots of liver macrophages, Kupffer cells (KCs), and monocyte-derived macrophages (MoMFs). Resident macrophage KCs accounted for approximately 80% of isolated cells. (B) 10  $\mu\text{g/ml}$  of lipoteichoic acid (LTA) or CpG oligodeoxynucleotide-treated KCs was incubated in serum-free LBP-containing medium with or without HDL<sub>3</sub>. (C) TNF- or IL-1 $\beta$ -treated KCs (each cytokine used at 100 ng/ml) was incubated in serum-free LBP-containing medium with or without HDL<sub>3</sub>. The leftmost colored bar in each graph corresponds with data wherein HDL<sub>3</sub> was not included but the stimulus was (LTA, CpG, etc.); the second colored bar corresponds with addition of 20  $\mu\text{g/ml}$  of HDL<sub>3</sub>; the last colored bar with 100  $\mu\text{g/ml}$  of HDL<sub>3</sub>. Open bars show results with no inflammatory stimulus added to the KC cultures. mRNA transcripts of inflammatory genes measured by qRT-PCR. Plots show mean  $\pm$  SEM analyzed by one-way ANOVA using a combination of male and female mice, with  $n=3-5$  mice per time point, combined from at least two independent experiments. \* $P<0.05$ ; \*\* $P<0.01$ ; \*\*\* $P<0.001$ ; # $P<0.05$ ; ## $P<0.01$ ; ### $P<0.001$ .

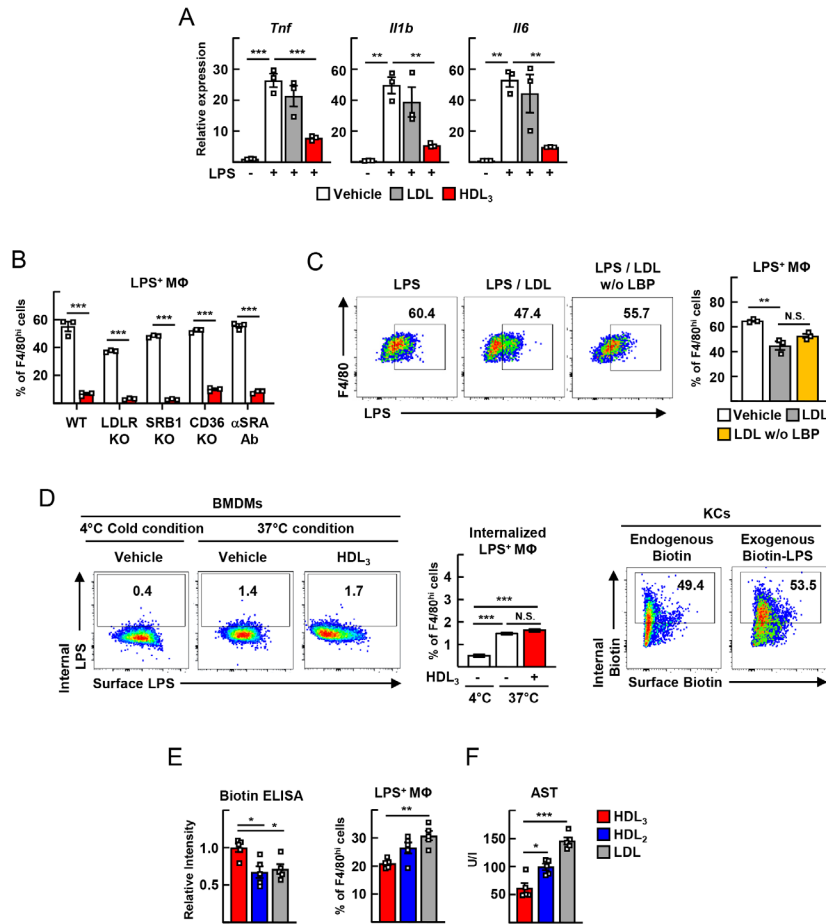

**Figure S4. KC binding to LPS, effect of HDL or LDL on this binding, and inactivation of LPS carried by lipoproteins** (A) KCs were incubated in serum-free LBP-containing medium with or without 20 ng/ml of LPS and 100  $\mu$ g/ml of LDL or HDL<sub>3</sub> and mRNA transcripts of inflammatory genes were measured by qRT-PCR. (B) Bone marrow-derived macrophages (BMDMs) or KCs obtained from WT, LDLR, SRB1, or CD36 knockout mice were incubated with LBP and HDL<sub>3</sub> in the presence of biotin-LPS. SRA was neutralized using an antibody. (C) KCs were incubated with LDL with or without LBP in the presence of biotin-LPS and analyzed by flow cytometry. (D) BMDMs (left) were cultured and studied here rather than KCs (right), which had a very high endogenous biotin content (right panel). BMDMs supported surface binding of biotin-LPS and this was inhibited by HDL<sub>3</sub>, as observed in KCs. Internalized biotin-LPS was detected in permeabilized cells and this was analyzed along with surface binding of biotin-LPS by flow cytometry. Less than 2% of BMDMs internalized LPS, even though surface binding at 37°C was evident by the right-shift on the x-axis of the flow plots when vehicle in the absence of HDL<sub>3</sub> was used. (E and F) HDL<sub>3</sub>, HDL<sub>2</sub>, or LDL complexed with equal amounts of biotin-LPS were injected to portal vein. Systemic plasma was harvested after 30 min. Biotin-LPS was measured by streptavidin peroxidase ELISA (E, left). Cell surface binding of biotin-LPS in KCs was analyzed (E, right). Plasma AST levels were measured (F). Plots show mean  $\pm$  SEM analyzed by unpaired two-tailed Student's *t* test [(B)] or one-way ANOVA [(A), (C), (D), (E) and (F)] using a combination of male and female mice, with n=3-5 mice per time point. Each symbol represents data obtained using a different mouse. \**P*<0.05; \*\**P*<0.01; \*\*\**P*<0.001.

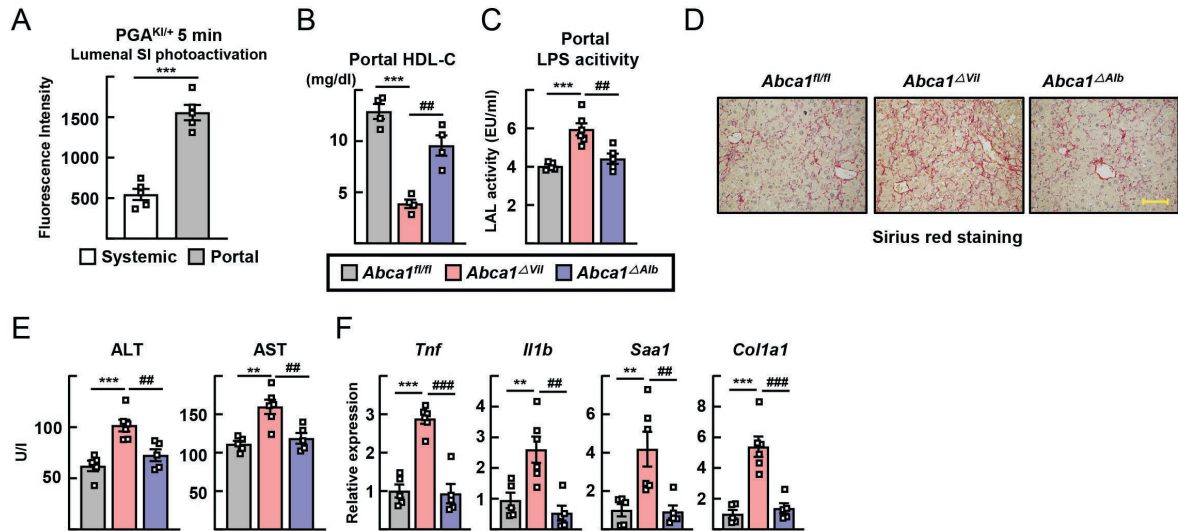

**Figure S5. SBR-induced liver injuries in female mice with conditional deletion of Abca1.**

(A) The lumens of the small intestinal ileum (SI) of female *Pga1<sup>KI/+</sup>* mice were photoactivated; portal plasma was assessed 5 min later. (B to F) 75% short bowel resection (SBR) operations were performed on *Abca1<sup>fl/fl</sup>* (n=5), *Abca1<sup>ΔVil1</sup>* (n=6), and *Abca1<sup>ΔAlb1</sup>* (n=5) mice and mice were euthanized 10 weeks later. (B) Portal HDL cholesterol levels. (C) Portal LPS activity assessed by LAL assay. (D) Representative images of Sirius red staining of liver sections. Scale bar: 100 μm. (E) Plasma ALT and AST levels. (F) Hepatic mRNA transcripts of inflammatory genes. Plots show mean ± SEM analyzed by unpaired two-tailed Student's *t* test [(A)] or one-way ANOVA [(B) to (F)] in female mice, with each symbol on the bar graphs representing a single mouse. \*\**P*<0.01; \*\*\**P*<0.001; ##*P*<0.01; ###*P*<0.001.

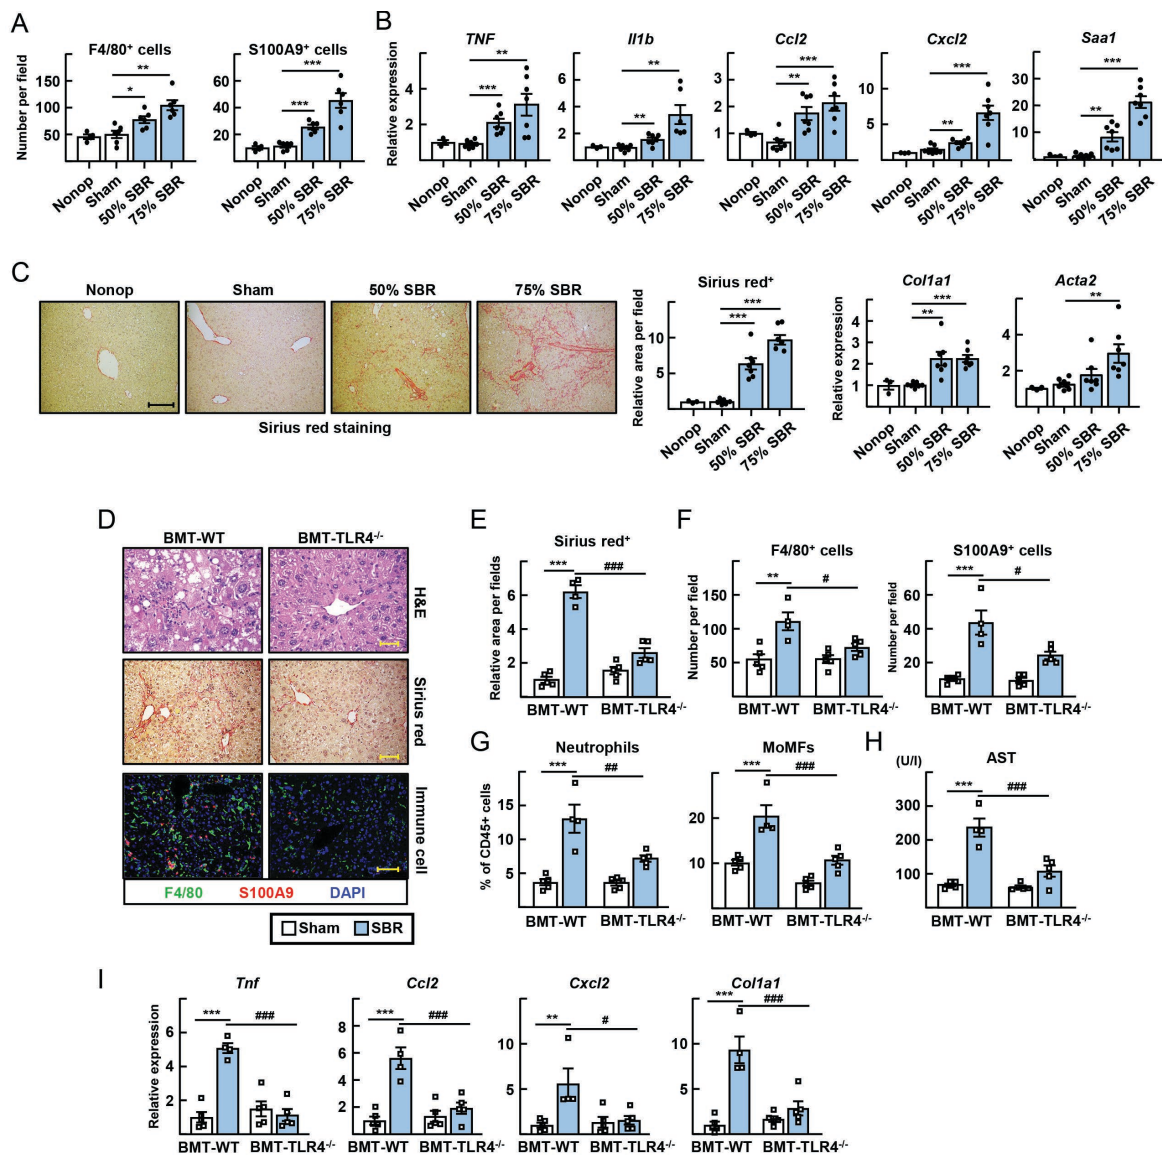

**Figure S6. SBR-induced liver injury after bone marrow transplant of WT or *Tlr4*<sup>-/-</sup> hematopoietic cells into WT hosts.** (A to C) Small bowel resection (SBR) operations were carried out on WT mice. Non-operated (Nonop) (n=4), sham (n=8), 50% SBR (n=8), or 75% SBR (n=8) mice were euthanized 12 weeks later. (A) Numbers of F4/80<sup>+</sup> macrophages and S100A9<sup>+</sup> neutrophils per high power field were counted. (B) Quantification of mRNA for inflammatory genes by qRT-PCR. (C) Representative images of Sirius red-stained liver sections (left). Scale bar: 200  $\mu$ m. Quantification of mRNA for *Colla1* and *Acta2* analyzed by qRT-PCR (right). (D to I) Mice receiving bone marrow transplants with WT or *Tlr4*<sup>-/-</sup> hematopoietic cells were later subjected to sham surgery or 75% short bowel resection and euthanized 10 weeks later. H&E, sirius red, and immunostaining of liver sections. Scale bar: 50  $\mu$ m (top) or 100  $\mu$ m (middle and bottom) (D). Relative sirius red positive area per field (E). Numbers of F4/80<sup>+</sup> macrophages and S100A9<sup>+</sup> neutrophils per field (F). The proportions of hepatic neutrophils and monocyte-derived macrophages (MoMFs) among CD45<sup>+</sup> leukocytes (G). Plasma AST levels (H). Hepatic mRNA transcripts of inflammatory genes analyzed by qRT-PCR (I). Plots show mean  $\pm$  SEM analyzed by one-way ANOVA in male mice, with each symbol on the bar graphs representing a single mouse. \**P*<0.05; \*\**P*<0.01; \*\*\**P*<0.001; #*P*<0.05; ###*P*<0.01; ####*P*<0.001.



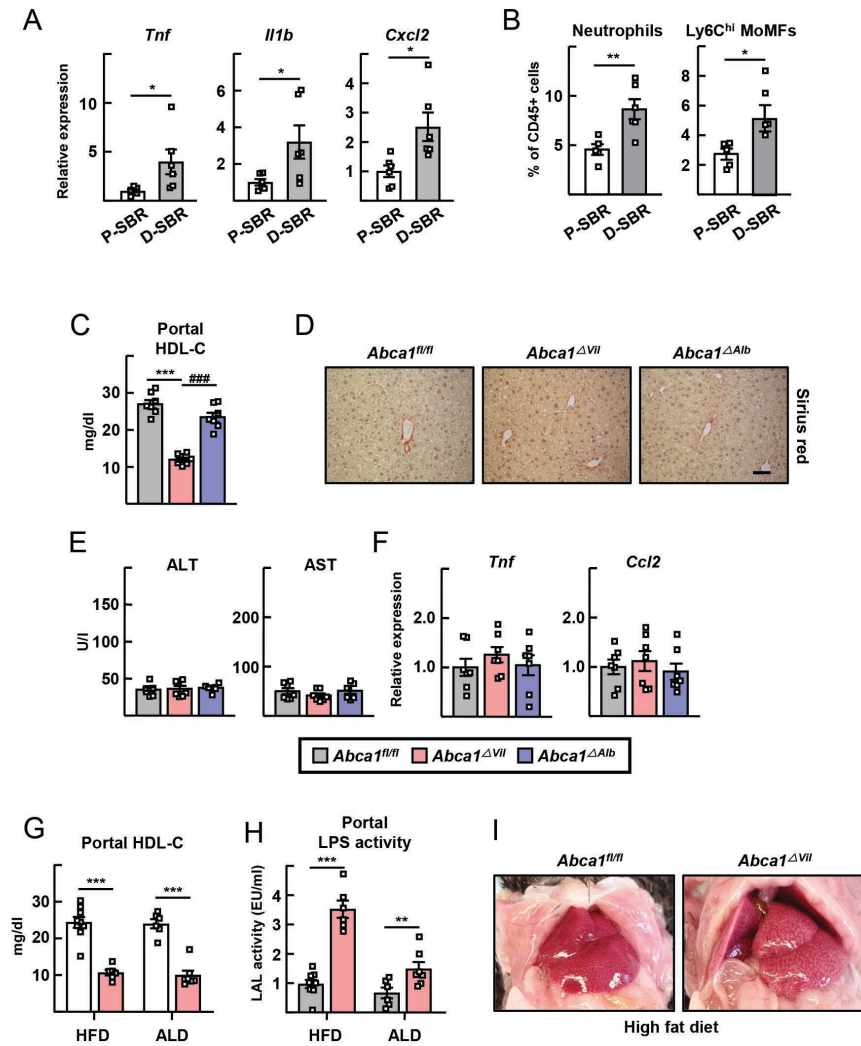

**Figure S7. Evaluation of liver injury in response to distal bowel resection, sham operation, high fat diet or alcoholic Lieber-DeCarli diets.** (A and B) SBR operations were conducted on WT mice. Mice receiving proximal 50% SBR (P-SBR) (n=6), or distal 50% SBR (D-SBR) (n=6) operations were euthanized 10 weeks later. (A) Hepatic mRNA transcripts of inflammatory genes. (B) The proportions of hepatic neutrophils and Ly6C<sup>hi</sup> monocyte-derived macrophages (MoMFs) among CD45<sup>+</sup> leukocytes. (C to F) Sham operations were carried out on *Abca1*<sup>fl/fl</sup> (n=7), *Abca1*<sup>ΔVil1</sup> (n=7), and *Abca1*<sup>ΔAlb1</sup> (n=7) mice, which were euthanized 8 weeks later. (C) Portal HDL cholesterol levels. (D) Representative images of sirius red staining of liver sections. Scale bar: 100 μm. (E) Plasma ALT and AST levels. (F) Hepatic mRNA transcripts of inflammatory genes. (G to I) *Abca1*<sup>fl/fl</sup> and *Abca1*<sup>ΔVil1</sup> mice were fed a high-fat diet (HFD) (n=9 *Abca1*<sup>fl/fl</sup>; n=6 *Abca1*<sup>ΔVil1</sup>) or alcohol-containing diet (ALD) (n=6 *Abca1*<sup>fl/fl</sup>; n=7 *Abca1*<sup>ΔVil1</sup>). (G) Portal HDL cholesterol levels. (H) Portal LPS activity assessed by LAL assay. (I) Representative pictures of intact livers after HFD. Plots show mean ± SEM analyzed by unpaired two-tailed Student's *t* test [(A), (B), (G) and (H)] or one-way ANOVA [(C)] in male mice, with each symbol on the bar graphs representing a single mouse. \*P<0.05; \*\*P<0.01; \*\*\*P<0.001; ####P<0.001.



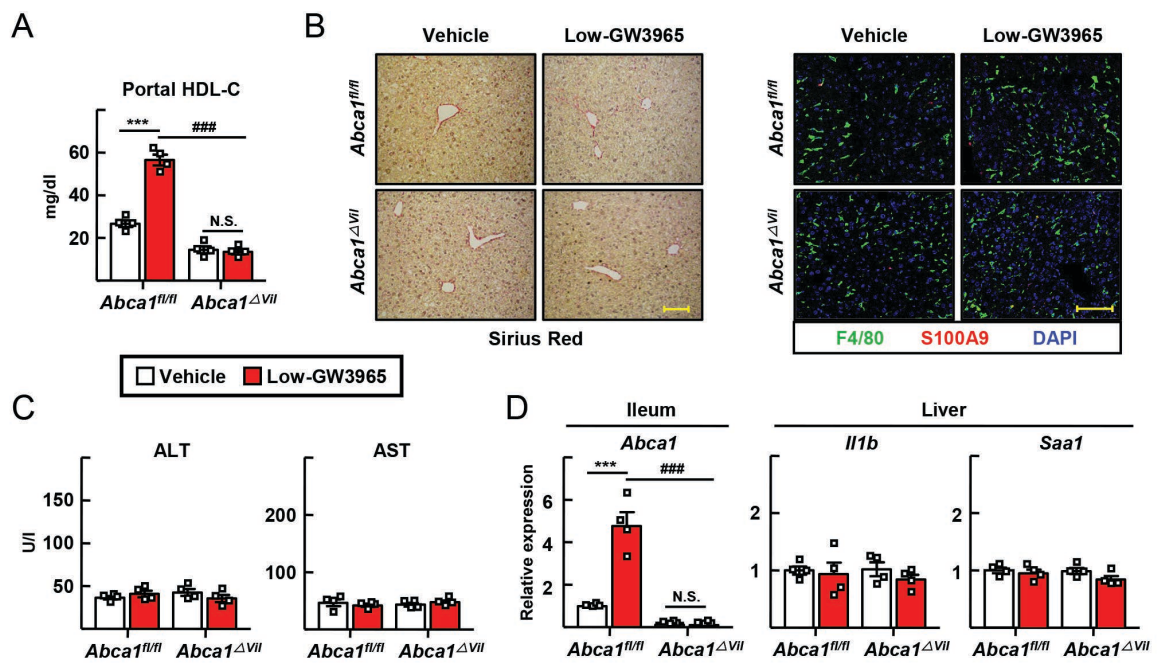

**Figure S8. Effect of low-dose GW3965 on the liver response.** (A) *Abca1<sup>fl/fl</sup>* and *Abca1<sup>ΔVII</sup>* mice received vehicle (n=10 *Abca1<sup>fl/fl</sup>*; n=8 *Abca1<sup>ΔVII</sup>*) or 1 mg/kg/day GW3965 (n=10 *Abca1<sup>fl/fl</sup>*; n=8 *Abca1<sup>ΔVII</sup>*) by gavage twice weekly in the last 5 weeks of a 10-week feeding following SBR (Low-GW3965). mRNA transcripts of LXR target genes in ileum, liver, and peritoneal cells were measured by qRT-PCR. (B) Representative image of ABCA1 (green) and F4/80 (red) immunostaining of ileum sections. Scale bar: 50  $\mu$ m. (C) *Abca1/g1<sup>fl/fl</sup>* and *Abca1/g1<sup>ΔLyz2</sup>* mice received vehicle (n=5 mice per genotype) or 1 mg/kg/day GW3965 (n=5 mice per genotype) by gavage twice weekly for 5 weeks. Portal HDL cholesterol levels are shown on the left, and mRNA transcripts of *Abca1* in ileum tissues analyzed by qRT-PCR on the right. All data are plotted as mean  $\pm$  SEM analyzed by one-way ANOVA in male mice, with each symbol on the bar graphs representing a single mouse. \* $P$ <0.05; \*\* $P$ <0.01; \*\*\* $P$ <0.001.

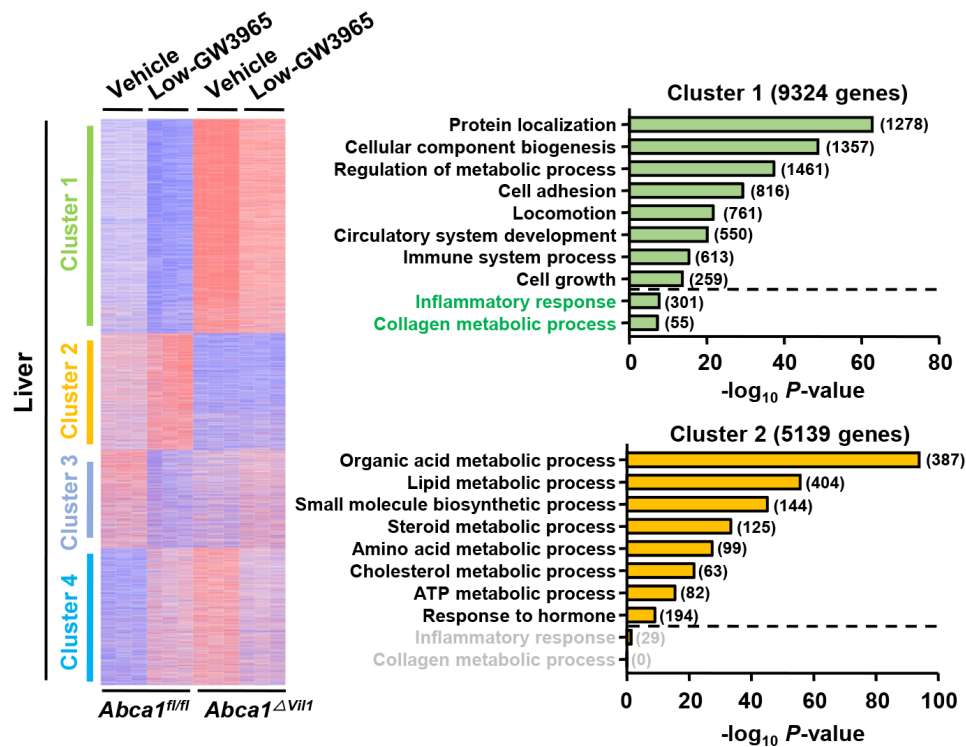

**Figure S9. Gene ontology pathways identified in the liver after oral, low-dose GW3965 treatment**

Global heat map of mRNA transcripts differentially expressed in liver tissue (left). Gene ontology pathways associated with cluster 1 and 2 genes are detailed on the right. Log<sub>10</sub> adjusted *P*-value is shown on the *x*-axis and the number of genes associated with the pathway is given in parentheses next to the bar corresponding to a particular pathway.

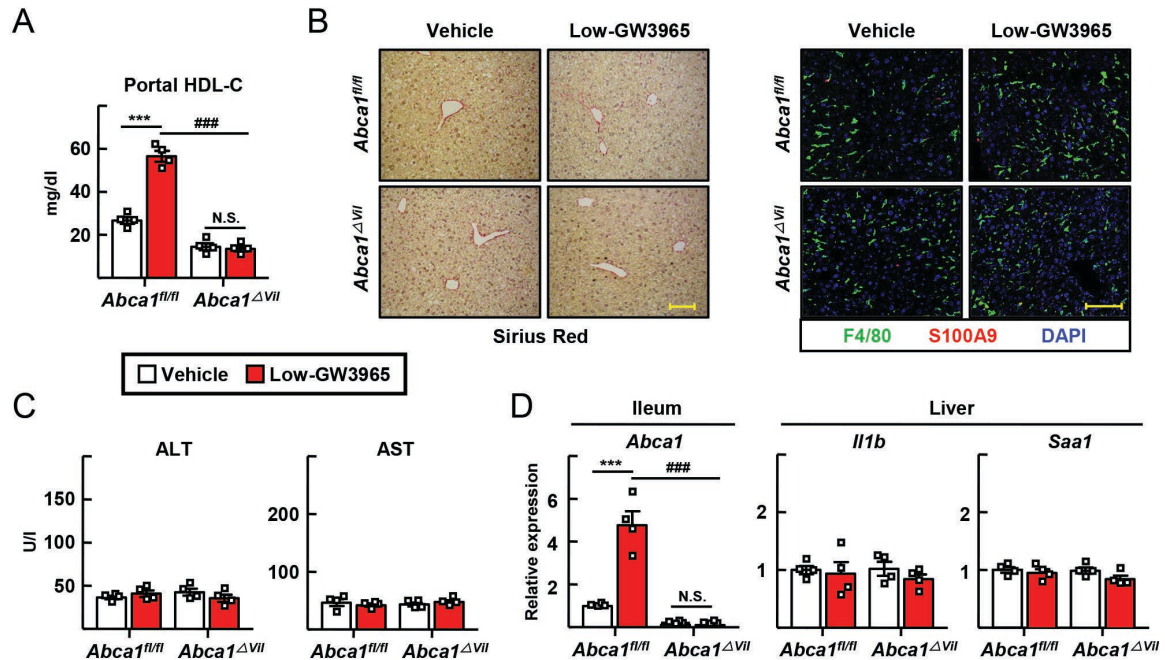

**Figure S10. Evaluation of liver injury in sham-operated control mice with or with GW3965 treatment.**

*Abca1<sup>fl/fl</sup>* and *Abca1<sup>ΔVII</sup>* mice received vehicle (n=4 mice per genotype) or 1 mg/kg/day GW3965 (n=4 mice per genotype) by gavage twice weekly in the last 5 weeks of a 10-week feeding following sham operation (Low-GW3965). (A) Portal HDL cholesterol levels are shown. (B) Representative images of Sirius red staining of liver sections are shown on the left, and representative images of F4/80<sup>+</sup> macrophages and S100A9<sup>+</sup> neutrophils visualized by immunofluorescence staining on the right. Scale bars: 100  $\mu$ m. (C) Plasma ALT and AST levels. (D) Ileum and liver mRNA transcripts were analyzed. Plots show mean  $\pm$  SEM analyzed by one-way ANOVA in male mice, with each symbol on the bar graphs representing a single mouse. \*\*\* $P < 0.001$ ; ### $P < 0.001$ .

**Caption to Table S1.**

A list of proteins associated with HDL<sub>2</sub> or HDL<sub>3</sub> derived from different venous locations and their quantitative values identified using proteomics.

**Table S2. Antibodies used, their source, and dilutions**

| Use             | Targets     | Vendors                               | Catalog numbers | Conjugates | Dilution     | Species      |
|-----------------|-------------|---------------------------------------|-----------------|------------|--------------|--------------|
| Immuno-staining | F4/80       | Abcam                                 | ab6640          | None       | 1:100        | Mouse        |
|                 | S100A9      | R&D systems                           | AF2065          | None       | 1:10000      | Mouse        |
|                 | vWF         | DAKO                                  | a0082           | None       | 1:200        | Mouse        |
|                 | PV1         | BD Pharmingen                         | 550563          | None       | 1:200        | Mouse        |
|                 | ABCA1       | Novus Biologicals                     | NB400-105       | None       | 1:100        | Mouse        |
| Immuno-blots    | apoA1       | Meridian Life Sciences                | K23001R         | None       | 1:5000       | Mouse        |
|                 | apoA1       | Millipore                             | MAB011          | None       | 1:5000       | Human        |
|                 | ABCA1       | Novus Biologicals                     | NB400-105       | None       | 1:2000       | Human        |
|                 | PON1        | Abcam                                 | ab24261         | None       | 1:2000       | Mouse, Human |
|                 | apoB        | Proteintech                           | 20578-1         | None       | 1:4000       | Mouse, Human |
|                 | LBP         | Abcam                                 | ab2333524       | None       | 1:3000       | Mouse, Human |
|                 | AOAH        | Proteintech                           | 12911-1         | None       | 1:3000       | Mouse, Human |
|                 | SERPIN A1   | Thermo Fisher                         | PA5-16661       | None       | 1:5000       | Mouse, Human |
|                 | ApoE        | D.M. Holzmann (Washington University) |                 | None       | 1:5000       | Mouse, Human |
| Albumin         | Proteintech | 16475-1                               | None            | 1:2000     | Mouse, Human |              |
| Flow            | CD45        | BD biosciences                        | 563791          | BUV396     | 1:500        | Mouse        |

|           |                   |               |            |             |       |       |
|-----------|-------------------|---------------|------------|-------------|-------|-------|
| cytometry | Ly6G              | Biolegend     | 127605     | FITC        | 1:300 | Mouse |
|           | F4/80             | Biolegend     | 123117     | APC/Cy7     | 1:300 | Mouse |
|           | Ly6C              | Biolegend     | 128011     | PerCP/Cy5.5 | 1:200 | Mouse |
|           | CD31              | Biolegend     | 102417     | PE/Cy7      | 1:300 | Mouse |
|           | iNOS              | Thermo Fisher | 53-5920-82 | Alexa 488   | 1:200 | Mouse |
|           | CD11b             | Thermo Fisher | 17-0112-81 | APC         | 1:300 | Mouse |
|           | Tim4              | Thermo Fisher | 12-5866-82 | PE          | 1:300 | Mouse |
|           | Clec4f            | R&D systems   | AF2784     | None        | 1:100 | Mouse |
|           | Strept-<br>avidin | Biolegend     | 405206     | PE/Cy7      | 1:200 |       |
|           | Strept-<br>avidin | Biolegend     | 405229     | BV605       | 1:200 |       |
